# Supplementary material for: Multi-Sensor Characterization of Sparkling Wines Based on Data Fusion
Source: MDPI journal article supplement (doi:10.3390/chemosensors9080200), 2021-07-30
Supplement: s1 [file s1]

# Supplementary material

## Multi-sensor characterization of sparkling wines based on data fusion

Anais Izquierdo-Llopart<sup>1</sup> and Javier Saurina<sup>1,2,\*</sup>

<sup>1</sup> Department of Chemical Engineering and Analytical Chemistry. University of Barcelona, Spain.

<sup>2</sup> Research Institute in Food Nutrition and Food Safety, University of Barcelona, Av. Prat de la Riba 171, Edifici Recerca (Gaudi), E08921 Santa Coloma de Gramenet, Spain.

\* Correspondence: [anais.izquierdo.llopart@gmail.com](mailto:anais.izquierdo.llopart@gmail.com) (A.I.L) and [xavi.saurina@ub.edu](mailto:xavi.saurina@ub.edu) (J.S.)

**Table S1.** Average, standard deviation, RSD (%), maximum and minimum concentrations of polyphenols in the set of samples under study. Standard deviation and relative standard deviation indicated the variability of concentrations as a measure of discriminating capacity among samples.

| Compound                | Average concentration (mg L <sup>-1</sup> ) | Standard deviation | RSD (%) | Maximum value (mg L <sup>-1</sup> ) | Minimum value (mg L <sup>-1</sup> ) |
|-------------------------|---------------------------------------------|--------------------|---------|-------------------------------------|-------------------------------------|
| FRAP index              | 5.45                                        | 1.71               | 31.36   | 10.72                               | 2.64                                |
| FC index                | 1.52                                        | 0.37               | 24.23   | 2.62                                | 1.06                                |
| Gallic acid             | 60.8                                        | 50.7               | 83.48   | 174.7                               | 10.7                                |
| Protocatechuic acid     | 1.66                                        | 7.93               | 478.3   | 43.03                               | <LOD                                |
| Homogentisic acid       | 0.56                                        | 2.72               | 488.0   | 15.87                               | <LOD                                |
| Gentisic acid           | 21.7                                        | 5.64               | 25.96   | 30.16                               | <LOD                                |
| (+)-catechin            | 72.0                                        | 34.6               | 48.09   | 127.9                               | <LOD                                |
| Caffeic acid            | 116.0                                       | 43.9               | 37.85   | 235.1                               | 54.2                                |
| Syringic acid           | 22.1                                        | 26.3               | 119.0   | 92.65                               | <LOD                                |
| Ethyl gallate           | 13.2                                        | 9.29               | 70.27   | 33.52                               | <LOD                                |
| <i>p</i> -Coumaric acid | 120.5                                       | 45.9               | 38.07   | 215.0                               | 56.4                                |
| Ferulic acid            | 13.2                                        | 3.21               | 24.35   | 20.75                               | 7.55                                |
| Caftaric acid           | 259.9                                       | 93.8               | 36.10   | 398.9                               | 71.1                                |

**Table S2.** Average, standard deviation, RSD (%), maximum and minimum concentrations of organic acids in the set of samples under study from enzymatic and HPLC methods.

| <b>Compound</b>      | <b>Average<br/>concentration<br/>(g L<sup>-1</sup>)</b> | <b>Standard<br/>deviation</b> | <b>RSD<br/>(%)</b> | <b>Maximum<br/>value<br/>(g L<sup>-1</sup>)</b> | <b>Minimum<br/>value<br/>(g L<sup>-1</sup>)</b> |
|----------------------|---------------------------------------------------------|-------------------------------|--------------------|-------------------------------------------------|-------------------------------------------------|
| Lactic acid – enz.   | 1.47                                                    | 0.46                          | 31.24              | 2.19                                            | 0.51                                            |
| Lactic acid - HPLC   | 2.35                                                    | 0.81                          | 34.47              | 3.76                                            | 0.44                                            |
| Gluconic acid – enz. | 0.07                                                    | 0.04                          | 49.92              | 0.14                                            | 0.02                                            |
| Gluconic acid - HPLC | 0.37                                                    | 0.05                          | 12.58              | 0.43                                            | 0.26                                            |
| Malic acid – enz.    | 0.19                                                    | 0.30                          | 159.8              | 1.02                                            | 0.02                                            |
| Malic acid - HPLC    | 0.56                                                    | 0.41                          | 73.42              | 1.69                                            | 0.11                                            |
| Acetic acid – enz.   | 0.23                                                    | 0.03                          | 14.86              | 0.30                                            | 0.19                                            |
| Citric acid - HPLC   | 0.14                                                    | 0.04                          | 31.61              | 0.26                                            | 0.08                                            |
| Succinic acid - HPLC | 0.51                                                    | 0.12                          | 23.99              | 0.76                                            | 0.33                                            |
| Tartaric acid - HPLC | 5.58                                                    | 0.45                          | 8.04               | 6.38                                            | 4.50                                            |

**Table S3.** Average, standard deviation, RSD (%), maximum and minimum values from FTIR, potentiometric and volumetric methods in the set of samples under study.

| <b>Compound</b>        | <b>Average<br/>concentration<br/>(g L<sup>-1</sup>)</b> | <b>Standard<br/>deviation</b> | <b>RSD<br/>(%)</b> | <b>Maximum<br/>value<br/>(g L<sup>-1</sup>)</b> | <b>Minimum<br/>value<br/>(g L<sup>-1</sup>)</b> |
|------------------------|---------------------------------------------------------|-------------------------------|--------------------|-------------------------------------------------|-------------------------------------------------|
| Reducing sugar - FTIR  | 8.99                                                    | 2.05                          | 22.7               | 10.31                                           | 1.43                                            |
| pH – FTIR (*)          | 3.04                                                    | 0.07                          | 2.34               | 3.13                                            | 2.90                                            |
| pH – potentiometry (*) | 2.98                                                    | 0.06                          | 2.16               | 3.09                                            | 2.85                                            |
| Acetic acid - FTIR     | 0.23                                                    | 0.08                          | 36.8               | 0.37                                            | 0.11                                            |
| Total acidity - FTIR   | 6.25                                                    | 0.43                          | 6.89               | 6.97                                            | 5.48                                            |
| Total acidity – vol.   | 6.25                                                    | 0.42                          | 6.75               | 7.10                                            | 5.50                                            |
| Malic acid - FTIR      | 0.30                                                    | 0.67                          | 221                | 2.20                                            | 0.00                                            |
| Lactic acid - FTIR     | 1.20                                                    | 0.75                          | 62.7               | 2.19                                            | 0.00                                            |
| Ethanol - FTIR         | 11.3                                                    | 0.30                          | 2.61               | 11.9                                            | 10.9                                            |

\* pH data values

**Table S4.** Summary of classification results by PLS-DA with 3 LVs for the assignation of white, blanc de noirs and rosé cava samples using the data fusion set.

| Target class   | Calibration     |                 | Validation      |                 |
|----------------|-----------------|-----------------|-----------------|-----------------|
|                | Sensitivity (%) | Selectivity (%) | Sensitivity (%) | Selectivity (%) |
| White          | 100             | 100             | 100             | 100             |
| Blanc de noirs | 100             | 100             | 100             | 100             |
| Rosé           | 100             | 100             | 100             | 90              |

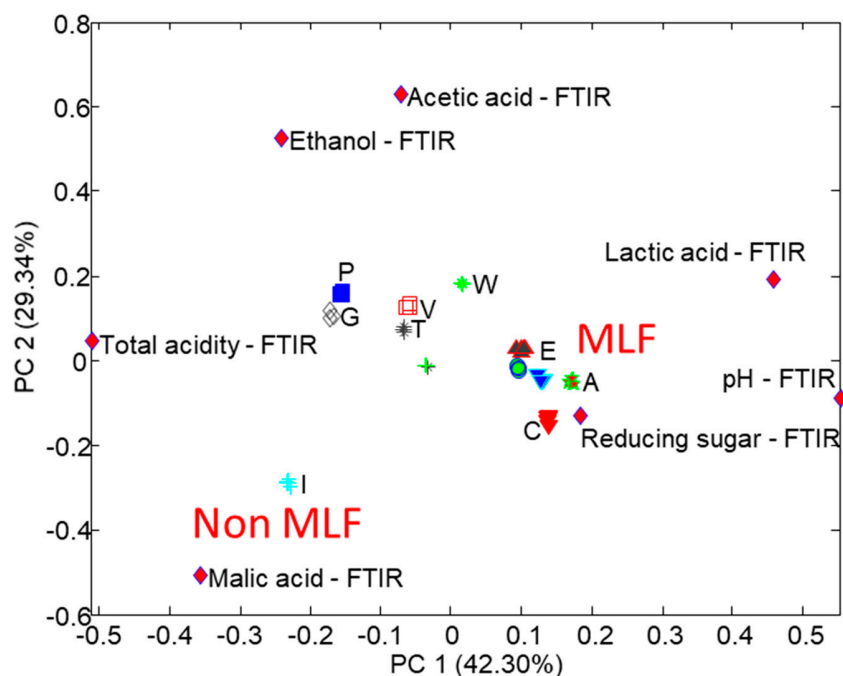

**Figure S1.** PCA results showing the biplot of PC1 vs PC2 from the study of FTIR data. Plot of scores (a) and plot of loadings (b). Cava class assignment: see Table 1.

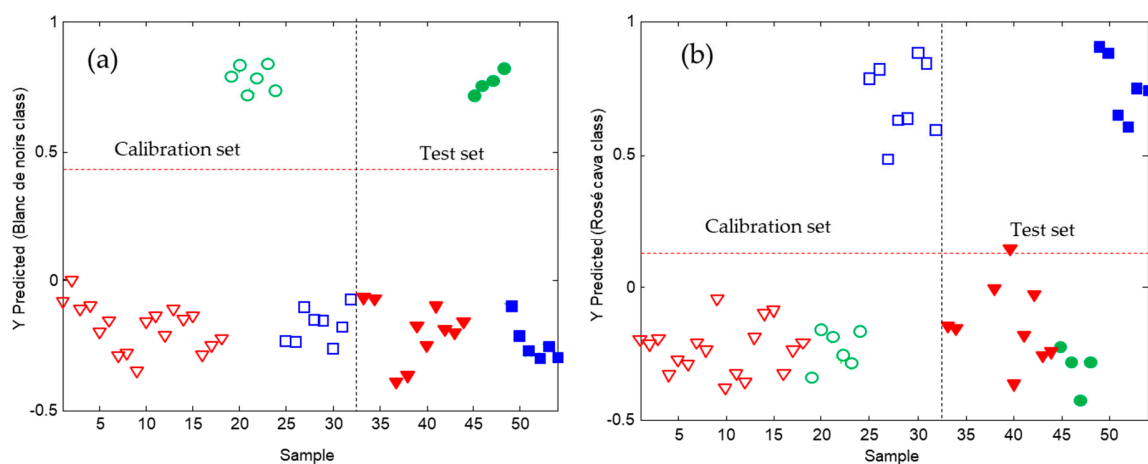

**Figure S2.** Classification plots from PLS-DA for the assignment of (a) blanc de noirs and (b) rosé cava samples. Sample assignment: triangle = white; square = rosé; circle = blanc de noirs; Empty symbols = calibration samples; Solid symbols = validation samples. Red line indicated the classification threshold.
